# Supplementary material for: Dendrobium catenatum Lindl. Water Extracts Attenuate Atherosclerosis
Source: Mediators Inflamm. 2021 Aug 24;2021:9951946. doi: 10.1155/2021/9951946 (PMC8407999; doi:10.1155/2021/9951946)
Supplement: Supplementary Materials — (See the Supplementary Materials 1 for specific steps), EVG staining. (See the Supplementary Materials 2 for specific steps) and oil red O staining. (See the Supplementary Materials 3 for specific steps). [file 9951946.f1.zip]

Archive with 3 entries (3 files):
- Supplementary Materials 1 (1).docx
- Supplementary Materials 2 (1).docx
- Supplementary Materials 3 (1).docx
